# Supplementary material for: Investigation of the signaling mechanism and verification of the performance of an electrochemical real-time PCR system based on the interaction of methylene blue with DNA
Source: Royal Society of Chemistry journal article supplement (doi:10.1039/c0an00695e), 2011-01-01
Supplement: c0an00695e.pdf [file c0an00695e.pdf]

Supplementary Information

**Investigation of the signaling mechanism and verification of the performance of an  
electrochemical real-time PCR system based on the interaction of methylene blue with DNA**

Byoung Yeon Won,<sup>a</sup> Sujeong Shin,<sup>a</sup> Songyi Baek,<sup>a</sup> Ye Lim Jung,<sup>a</sup> Taihua Li,<sup>a</sup> Sung Chul Shin,<sup>a</sup> Dae-  
Yeon Cho,<sup>b</sup> Sang Bok Lee,<sup>c,d</sup> and Hyun Gyu Park\*<sup>a</sup>

<sup>a</sup> *Department of Chemical and Biomolecular Engineering, KAIST, Daejeon 305-701, Republic of Korea. Fax: +82 42 350 3910; Tel: +82 42 350 3932; E-mail: hgpark@kaist.ac.kr*

<sup>b</sup> *Clinical Research Institute, Labgenomics, Seoul, 137-874, Republic of Korea*

<sup>c</sup> *Department of Chemistry and Biochemistry, University of Maryland, College Park, MD 20742*

<sup>d</sup> *Graduate School of Nanoscience and Technology (WCU), KAIST, Daejeon 305-701, Republic of Korea*

**Genomic DNA isolation.** A 30 mL sample of a urine specimen, collected from a patient infected by *Chlamydia trachomatis* after prostatic massage, was centrifuged at 14,000 ×g for 2 min. The centrifuged pellet was then washed twice with 1 mL of PBS (0.2 M phosphate, 1.5 M sodium chloride, pH 7.4) and resuspended in 400 μL of PBS. Genomic DNA was extracted by using an Accuprep<sup>TM</sup> Genomic DNA Extraction Kit (Bioneer, Korea) according to the manufacturer's protocol and was stored at -20°C until use.

**Preparation of template DNA.** Amplification of the specific sites of *Chlamydia trachomatis* gene encoding virulence proteins was performed on a PCT-0200 (Bio-rad, Hercules, CA) thermo cycler in a 50  $\mu$ L solution containing 1  $\mu$ L of template, 0.25  $\mu$ M of each primer (forward: 5'-TTAATG GAAAAGTTGTTTCA-3' and reverse: 5'-TCCATATCTTTGATACGACG-3'), 5  $\mu$ L of 10 $\times$  PCR reaction buffer (500 mM Tris-HCl, 100 mM KCl, 50 mM (NH<sub>4</sub>)<sub>2</sub>SO<sub>4</sub>, 20 mM MgCl<sub>2</sub>), 0.2 mM dNTPs, and 1.25 U FastStart Taq DNA polymerase. PCR was programmed for 4 min at 95 °C, followed by 40 cycles of 30 s at 95 °C, 30 s at 55°C, and 1 min at 72°C, and finalized with 7 min at 72 °C. The resulting 1800 bp-long PCR product after the purification (NucleoSpin<sup>TM</sup>, Macherey-Nagel, Duren, Germany) was used as a template in this work.

**Preparation of DNA sample by secondary PCR.** dsDNA was obtained from the secondary PCR of the template employing the same procedure described above but different primers (forward: 5'-CCATCTTCTTTGAAGCGTTGT and reverse: 5'-ACAGGATGACTCAAGGAATAG). The resulting 612 bp-long dsDNA was used in fluorescent or electrochemical titration experiments.

**Conventional real-time PCR with TaqMan probe.** Conventional real-time PCR amplification was carried out in a microfuge tube containing 10  $\mu$ L of two-fold master mix buffer containing DNA polymerase and dNTPs (FINNZYMES, Finland), 0.25  $\mu$ M of each primer (forward: 5'-AGGCGTTTGTACTCCGTCAC-3' and reverse: 5'-TGGTGGGGTTAAGGCAAATCG-3'), 0.25  $\mu$ M of TaqMan probe (5'-FAM/CCGCACGTTCTCTCAAGCAGGACTACA/BHQ\_1) and deionized water in a total volume of 20  $\mu$ l with C1000 thermal cycler in the combination with CFX96 real-time system (Bio-rad). After denaturing at 95 °C for 15 min, the reaction was carried out during 40 cycles at 95 °C for 15 s and 60 °C for 1 min. The florescent signal was recorded after every extension step.

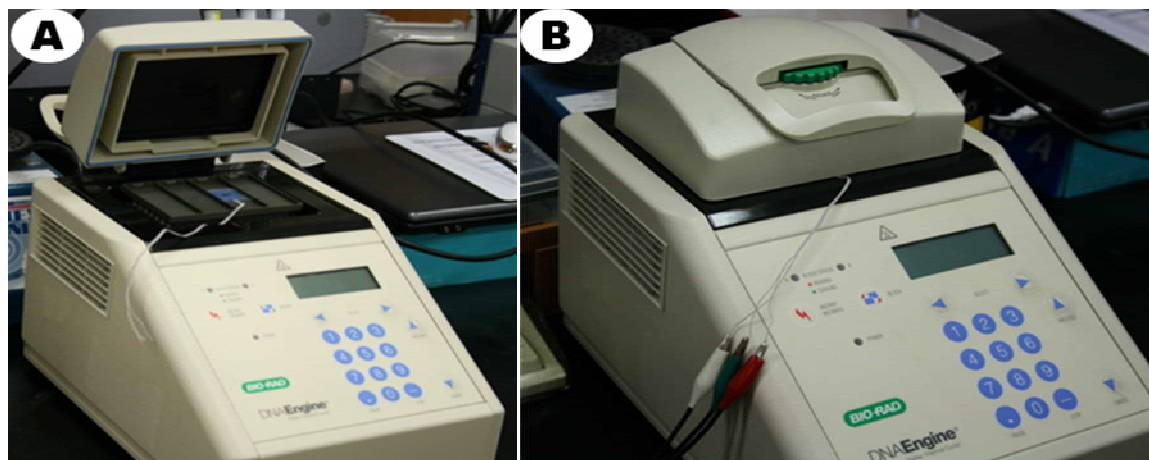

**Figure S1.** Pictures of the PCR device for the electrochemical real-time PCR. (A) PCR chip in thermocycler and (B) Link with electrochemical analyzer.
